# Supplementary material for: Improving phosphorus sustainability of sugarcane production in Brazil
Source: PubMed Central journal article supplement (PMC6919938; doi:10.1111/gcbb.12650), 2019-10-18
Supplement: GCBB-11-1444-s001.pdf [file GCBB-11-1444-s001.pdf]

Supplementary Information for

## Improving Phosphorus Sustainability of Sugarcane Production in Brazil

Amin Soltangheisi<sup>\*,a</sup>, Paul J. A. Withers<sup>b</sup>, Paulo Sergio Pavinato<sup>c</sup>, Mauricio Cherubin<sup>c</sup>, Raffaella Rossetto<sup>d</sup>, Janaina Braga Do Carmo<sup>e</sup>, Gustavo Casoni da Rocha<sup>f</sup>, Luiz Antonio Martinelli<sup>a</sup>

### Author Affiliations:

<sup>a</sup>Departamento de Ecologia Isotópica, Centro de Energia Nuclear na Agricultura (CENA), Universidade de São Paulo (USP), Av. Centenário, 303 - São Dimas, CEP 13416-000, Piracicaba, SP, Brazil

<sup>b</sup>Lancaster Environment Centre, Lancaster University, Lancaster, UK

<sup>c</sup>Departamento de Ciência do Solo, Escola Superior de Agricultura Luiz de Queiroz, Universidade de São Paulo – ESALQ/USP, Av. Pádua Dias, 11, CEP 13418-900, Piracicaba-SP, Brazil

<sup>d</sup>Center-South Regional Pole, Paulista Agency for Agribusiness Technology (APTA), Rod. SP 127 km 30, 13400-970 Piracicaba, SP, Brazil

<sup>e</sup>Department of Environmental Sciences, Federal University of São Carlos (UFSCar), Rod. João Leme dos Santos Km 110, 18052-780 Sorocaba, SP, Brazil

<sup>f</sup>Faculdade de Ciências Agrônômicas, Universidade Estadual Paulista (Unesp), Av. Universitária, nº 3780, CEP 18610-034, Altos do Paraíso, Botucatu, SP, Brazil

\*To whom correspondence should be addressed: [soltangheisi@usp.br](mailto:soltangheisi@usp.br)

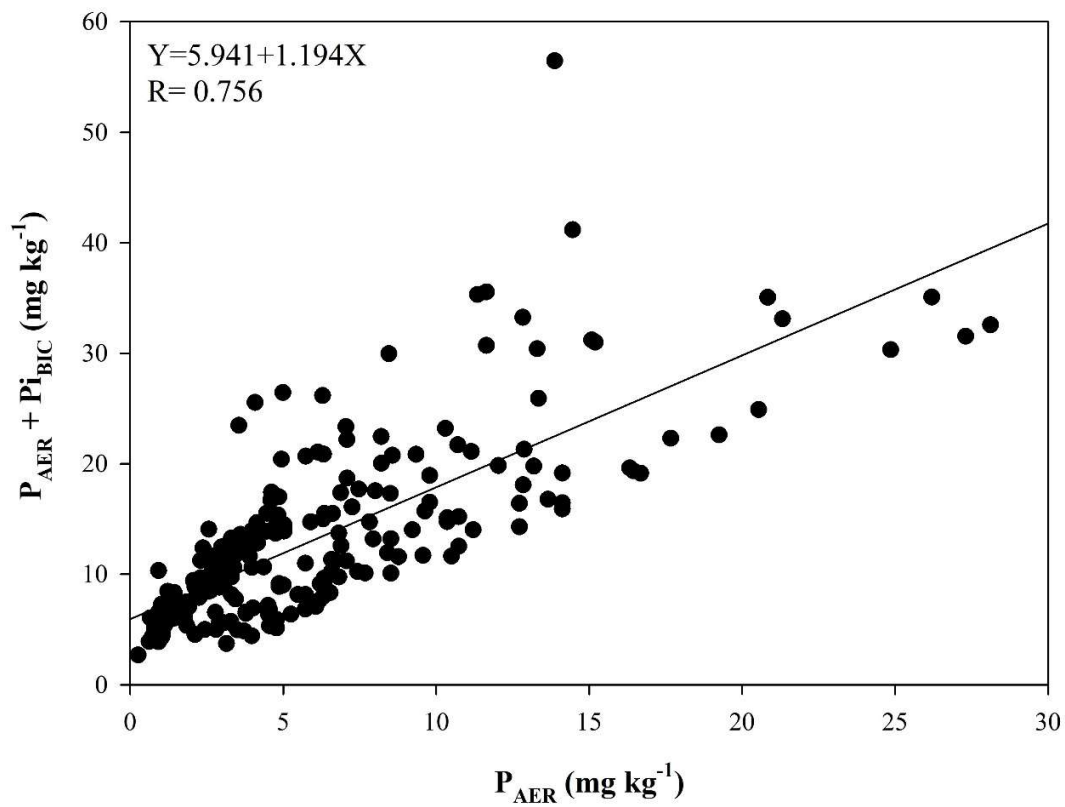

**Supplementary Figure 1.** Relationship between inorganic labile P ( $P_{AER} + P_{iBIC}$ ) and resin P ( $P_{AER}$ ) in 8 different Brazilian sugarcane fields investigated in this study.

**Supplementary Table 1.** Advantages and disadvantages of different sources of phosphorus applied in Brazilian sugarcane fields

| Phosphate Sources |                    | Advantages                                                                                                                                                                                                                           | Disadvantages                                                                                                                                                                                                                                                                                                                                                                                                                                 |
|-------------------|--------------------|--------------------------------------------------------------------------------------------------------------------------------------------------------------------------------------------------------------------------------------|-----------------------------------------------------------------------------------------------------------------------------------------------------------------------------------------------------------------------------------------------------------------------------------------------------------------------------------------------------------------------------------------------------------------------------------------------|
| Primary sources   |                    |                                                                                                                                                                                                                                      |                                                                                                                                                                                                                                                                                                                                                                                                                                               |
| Water soluble     | MAP, DAP, SSP, TSP | <ul style="list-style-type: none"> <li>• High initial agronomic efficiency</li> <li>• High amount of water soluble P<sub>2</sub>O<sub>5</sub></li> </ul>                                                                             | <ul style="list-style-type: none"> <li>• Expensive</li> <li>• More susceptible to loss via erosion</li> </ul>                                                                                                                                                                                                                                                                                                                                 |
| Less soluble      |                    |                                                                                                                                                                                                                                      |                                                                                                                                                                                                                                                                                                                                                                                                                                               |
|                   | Rock phosphate     | <ul style="list-style-type: none"> <li>• Less expensive</li> <li>• Low P loss via leaching and erosion</li> </ul>                                                                                                                    | <ul style="list-style-type: none"> <li>• Releases P slowly suitable for areas with medium to high soil P levels</li> <li>• Low agronomic efficiency in short term</li> <li>• No water soluble P<sub>2</sub>O<sub>5</sub></li> </ul>                                                                                                                                                                                                           |
|                   | Thermophosphate    | <ul style="list-style-type: none"> <li>• Contains magnesium, micronutrients and silicon</li> <li>• Low P loss via leaching and erosion</li> <li>• Low P fixation by Fe and Al (hydr)oxides due to the presence of silicon</li> </ul> | <ul style="list-style-type: none"> <li>• Expensive</li> </ul>                                                                                                                                                                                                                                                                                                                                                                                 |
|                   | Biofertilizers     | <ul style="list-style-type: none"> <li>• Reduce P rates by 25-30%</li> <li>• Replacing expensive sources of P with rock phosphate</li> </ul>                                                                                         | <ul style="list-style-type: none"> <li>• Difficulties associated with isolation and multiplication of pure strains of PSBs</li> </ul>                                                                                                                                                                                                                                                                                                         |
| Secondary sources |                    |                                                                                                                                                                                                                                      |                                                                                                                                                                                                                                                                                                                                                                                                                                               |
|                   | Filter cake        | <ul style="list-style-type: none"> <li>• Reduce the need for mineral fertilizers</li> <li>• Contains 1.2-1.8% of P</li> <li>• Contains 70% humidity which guarantees the sprouting of cane planted in winter</li> </ul>              | <ul style="list-style-type: none"> <li>• It is free but the transport cost from the mill to the field is expensive</li> <li>• Slow release P as it is mainly organic</li> </ul>                                                                                                                                                                                                                                                               |
|                   | Vinasse            | <ul style="list-style-type: none"> <li>• Reduce the need for mineral fertilizers</li> <li>• Provide water retention</li> <li>• Increase organic matter and soil microflora</li> </ul>                                                | <ul style="list-style-type: none"> <li>• It is free but the transport cost from the mill to the field is expensive</li> <li>• Slow release P as it is organic</li> <li>• Contains very high amounts of potassium</li> <li>• Risk of salinization in rates higher than 400 m<sup>3</sup> ha<sup>-1</sup></li> <li>• Causes delay of the maturation process in high quantities</li> <li>• Contamination of ground water via leaching</li> </ul> |
|                   | Straw              | <ul style="list-style-type: none"> <li>• Reduce the need for mineral fertilizers</li> <li>• Reduces erosion</li> <li>• Improve soil carbon content</li> <li>• Provide water retention</li> </ul>                                     |                                                                                                                                                                                                                                                                                                                                                                                                                                               |

**Supplementary Table 2.** Soil phosphorus fractions in the sites investigated in this study

|                       | Brotas <sup>†</sup> | Sorocaba <sup>†</sup> | Agudos <sup>‡</sup> | Ipaussu <sup>§</sup> | Macatuba <sup>‡</sup> | Manduri <sup>†</sup> | Valparaiso <sup>§</sup> | Jatai <sup>§</sup> |
|-----------------------|---------------------|-----------------------|---------------------|----------------------|-----------------------|----------------------|-------------------------|--------------------|
| P <sub>AER</sub>      | 1.2                 | 1.1                   | 4.0                 | 3.8                  | 7.3                   | 5.6                  | 10.1                    | 4.5                |
| P <sub>iBIC</sub>     | 5.6                 | 6.0                   | 7.6                 | 9.4                  | 8.6                   | 11.1                 | 9.7                     | 21.4               |
| P <sub>OBIC</sub>     | 47.6                | 56.5                  | 16.0                | 23.8                 | 16.3                  | 28.5                 | 38.9                    | 9.4                |
| P <sub>iHID-0.1</sub> | 23.1                | 22.9                  | 21.0                | 83.4                 | 18.5                  | 32.1                 | 28.1                    | 62.3               |
| P <sub>OHID-0.1</sub> | 45.7                | 109.2                 | 45.5                | 42.7                 | 94.1                  | 183.0                | 89.1                    | 72.6               |
| P <sub>HCl</sub>      | 1.3                 | 0.8                   | 32.5                | 14.8                 | 11.5                  | 2.6                  | 14.2                    | 4.5                |
| P <sub>iHID-0.5</sub> | 6.9                 | 9.2                   | 22.0                | 128.0                | 34.2                  | 15.0                 | 11.2                    | 74.4               |
| P <sub>OHID-0.5</sub> | 46.4                | 47.0                  | 26.5                | 33.2                 | 65.5                  | 82.5                 | 79.4                    | 73.2               |
| P <sub>residual</sub> | 77.0                | 418.0                 | 76.9                | 667.2                | 274.5                 | 1127.0               | 202.7                   | 328.8              |
| P <sub>total</sub>    | 255.0               | 671.0                 | 252.0               | 1006.5               | 530.5                 | 1487.0               | 489.5                   | 650.9              |

<sup>†</sup>unpublished data obtained by A. Soltangheisi

<sup>‡</sup>data from Soltangheisi et al. (2019)

<sup>§</sup>data from Cherubin et al. (2016)

P<sub>AER</sub>: P extracted with anion exchange resin; P<sub>iBIC</sub> and P<sub>OBIC</sub>: inorganic and organic P extracted with 0.5 mol L<sup>-1</sup> NaHCO<sub>3</sub>; P<sub>iHID-0.1</sub> and P<sub>OHID-0.1</sub>: inorganic and organic P extracted with 0.1 mol L<sup>-1</sup> NaOH; P<sub>HCl</sub>: phosphorus extracted with 1.0 mol L<sup>-1</sup> HCl; P<sub>iHID-0.5</sub> and P<sub>OHID-0.5</sub>: inorganic and organic P extracted with 0.5 mol L<sup>-1</sup> NaOH; P<sub>residual</sub>: phosphorus extracted with concentrated H<sub>2</sub>SO<sub>4</sub>+30% H<sub>2</sub>O<sub>2</sub> and saturated magnesium chloride. Sequential fractionation in all sites was performed by a methodology proposed by Hedley, Stewart, & Chauhan (1982) and modified by Condon, Goh, & Newman (1985).

### Supplementary References

- Cherubin, M. R., Franco, A. L., Cerri, C. E., Karlen, D. L., Pavinato, P. S., Rodrigues, M., ... Cerri, C. C. (2016). Phosphorus pools responses to land-use change for sugarcane expansion in weathered Brazilian soils. *Geoderma*, **265**, 27-38.
- Condon, L. M., Goh, K. M., & Newman, R.H. (1985). Nature and distribution of soil phosphorus as revealed by a sequential extraction method followed by <sup>31</sup>P nuclear magnetic resonance analysis. *European Journal of Soil Science*, **36(2)**, 199–207.
- Hedley, M. J., Stewart, J. W. B., & Chauhan, B. (1982). Changes in inorganic and organic soil phosphorus fractions induced by cultivation practices and by laboratory incubations. *Soil Science Society of America Journal*, **46(5)**, 970-976.
- Soltangheisi, A., Santos, V. R., Franco, H. C. J., Kolln, O., Vitti, A. C., Santos Dias, ... Pavinato, P. S. (2019). Phosphate sources and filter cake amendment affecting sugarcane yield and soil phosphorus fractions. *Revista Brasileira de Ciência do Solo*. **43:e0180227**.
